# Supplementary material for: Salvadoran Celastraceae Species as a Source of Antikinetoplastid Quinonemethide Triterpenoids
Source: MDPI journal article supplement (doi:10.3390/plants13030360), 2024-01-25
Supplement: s1 [file s1]

# Electronic Supporting Information

## Salvadoran Celastraceae species as a source of antikinetoplastid quinomethide triterpenoids

Marvin J. Núñez<sup>1</sup>, Morena L. Martínez<sup>1</sup>, Ulises G. Castillo<sup>1</sup>, Karla Carolina Flores<sup>1</sup>, Jenny Menjívar<sup>2</sup>, Atteneri López-Arencibia<sup>3,4,5</sup>, Carlos J. Bethencourt-Estrella<sup>3</sup>, Ignacio A. Jiménez<sup>6</sup>, José E. Piñero<sup>3,4,5</sup>, Jacob Lorenzo-Morales<sup>3,4,5</sup> and Isabel L. Bazzocchi<sup>6,\*</sup>

<sup>1</sup> Laboratorio de Investigación en Productos Naturales (LIPN), Facultad de Química y Farmacia, Universidad de El Salvador, Final Ave. Mártires Estudiantes del 30 de Julio, 01101, San Salvador, El Salvador

<sup>2</sup> Museo de Historia Natural de El Salvador, Ministerio de Cultura, Final Calle Los Viveros, Col. Nicaragua, 01101, San Salvador, El Salvador

<sup>3</sup> Instituto Universitario de Enfermedades Tropicales y Salud Pública de Canarias, Universidad de La Laguna, 38200 La Laguna, Tenerife, Spain

<sup>4</sup> Departamento de Obstetricia y Ginecología, Pediatría, Medicina Preventiva y Salud Pública, Toxicología, Medicina Legal y Forense y Parasitología, Universidad de La Laguna, 38200 La Laguna, Tenerife, Spain

<sup>5</sup> Centro de Investigación Biomédica en Red de Enfermedades Infecciosas (CIBERINFEC), Instituto de Salud Carlos III, 28220 Madrid, Spain

<sup>6</sup> Instituto Universitario de Bio-Organica Antonio González, Departamento de Química Orgánica, Universidad de La Laguna, Avenida Astrofísico Francisco Sánchez 2, 38206 La Laguna, Tenerife, Spain

### Table of Contents

**Table S1:** Organic extracts and fractions of Celastraceae species assayed as anti-kinetoplastid against *Trypanosoma cruzi*, *Leishmania amazonensis*, and *Leishmania donovani*.

**Figure S1.** Selected Thin Layer Chromatography (TLC) of phytochemical analysis.

**Table SI.** Organic extracts and fractions of Celastraceae species assayed against *Trypanosoma cruzi*, *Leishmania amazonensis*, and *Leishmania donovani*.

| Specie                         | Plant part | Fraction or Extract           | <i>T. cruzi</i><br>IC <sub>50</sub> (µg/mL) | <i>L. amazonensis</i><br>IC <sub>50</sub> (µg/mL) | <i>L. donovani</i><br>IC <sub>50</sub> (µg/mL) |
|--------------------------------|------------|-------------------------------|---------------------------------------------|---------------------------------------------------|------------------------------------------------|
| <i>Maytenus segoviarum</i>     | Leaves     | F/DCM                         | inactive                                    | inactive                                          | inactive                                       |
|                                |            | F/ <i>n</i> -BuOH             |                                             |                                                   |                                                |
|                                | Branches   | F/DCM                         |                                             | 7.83 ± 0.33                                       |                                                |
|                                |            | F/ <i>n</i> -BuOH             |                                             | inactive                                          |                                                |
|                                | Root bark  | E/hex:Et <sub>2</sub> O (1:1) | 1.36 ± 0.17                                 | 0.85 ± 0.10                                       | >100                                           |
|                                |            | E/MeOH                        | >100                                        | 36.50 ± 4.49                                      | inactive                                       |
|                                |            | E/Acetone                     | >50                                         | >50                                               |                                                |
|                                | Fruits     | E/hex:Et <sub>2</sub> O (1:1) | inactive                                    | inactive                                          |                                                |
|                                |            | E/MeOH                        |                                             |                                                   |                                                |
|                                |            | E/Acetone                     |                                             |                                                   |                                                |
| <i>Quetzalia ilicina</i>       | Leaves     | F/DCM                         | inactive                                    | 15.20 ± 0.80                                      | inactive                                       |
|                                |            | F/ <i>n</i> -BuOH             |                                             | inactive                                          |                                                |
|                                | Branches   | F/DCM                         |                                             | >50                                               |                                                |
|                                |            | F/ <i>n</i> -BuOH             |                                             | inactive                                          |                                                |
|                                | Root bark  | E/hex:Et <sub>2</sub> O (1:1) | 3.45 ± 0.35                                 | 3.06 ± 0.77                                       | >50                                            |
|                                |            | E/MeOH                        | 3.06 ± 0.68                                 | 1.40 ± 0.21                                       | >100                                           |
|                                |            | E/Acetone                     | 1.58 ± 0.03                                 | 1.34 ± 0.22                                       | 5.42 ± 0.85                                    |
|                                | Fruits     | E/hex:Et <sub>2</sub> O (1:1) | inactive                                    | inactive                                          | inactive                                       |
|                                |            | E/MeOH                        |                                             | 51.76 ± 0.95                                      |                                                |
|                                |            | E/Acetone                     |                                             |                                                   |                                                |
| <i>Zinowiewia integerrima</i>  | Leaves     | F/DCM                         | inactive                                    | >50                                               | inactive                                       |
|                                |            | F/ <i>n</i> -BuOH             |                                             | inactive                                          |                                                |
|                                | Branches   | F/DCM                         |                                             | 23.78 ± 0.44                                      |                                                |
|                                |            | F/ <i>n</i> -BuOH             |                                             | inactive                                          |                                                |
|                                | Root bark  | E/hex:Et <sub>2</sub> O (1:1) | 0.71 ± 0.04                                 | 0.59 ± 0.05                                       | >100                                           |
|                                |            | E/MeOH                        | 2.87 ± 0.39                                 | 1.13 ± 0.07                                       | >100                                           |
|                                |            | E/Acetone                     | 0.75 ± 0.07                                 | 0.38 ± 0.08                                       | >100                                           |
| <i>Wimmeria cyclocarpa</i>     | Leaves     | F/DCM                         | inactive                                    | inactive                                          | inactive                                       |
|                                |            | F/ <i>n</i> -BuOH             |                                             |                                                   |                                                |
|                                | Branches   | F/DCM                         |                                             |                                                   |                                                |
|                                |            | F/ <i>n</i> -BuOH             |                                             |                                                   |                                                |
|                                | Root bark  | E/hex:Et <sub>2</sub> O (1:1) | >50                                         | 6.96 ± 0.88                                       | >50                                            |
|                                |            | E/MeOH                        | inactive                                    | 24.99 ± 0.74                                      | inactive                                       |
|                                |            | E/Acetone                     | >50                                         | 9.32 ± 1.96                                       | >50                                            |
| <i>Euonymus enantiophyllus</i> | Leaves     | F/DCM                         | inactive                                    | inactive                                          | inactive                                       |
|                                |            | F/ <i>n</i> -BuOH             |                                             |                                                   |                                                |
|                                | Branches   | F/DCM                         |                                             |                                                   |                                                |
|                                |            | F/ <i>n</i> -BuOH             |                                             |                                                   |                                                |
|                                | Root bark  | E/hex:Et <sub>2</sub> O (1:1) |                                             | 2.05 ± 0.10                                       |                                                |
|                                |            | E/MeOH                        |                                             | precipitate                                       |                                                |
|                                |            | E/Acetone                     |                                             | 4.58 ± 0.05                                       |                                                |
| Fruits                         | E/Acetone  | inactive                      |                                             |                                                   |                                                |

E= extract; F= fraction; DCM = Dichloromethane; *n*-BuOH = *n*-butanol; hex = hexanes; inactive > 100 µg/mL.

**Figure SI.** Selected Thin Layer Chromatography (TLC) of phytochemical analysis.

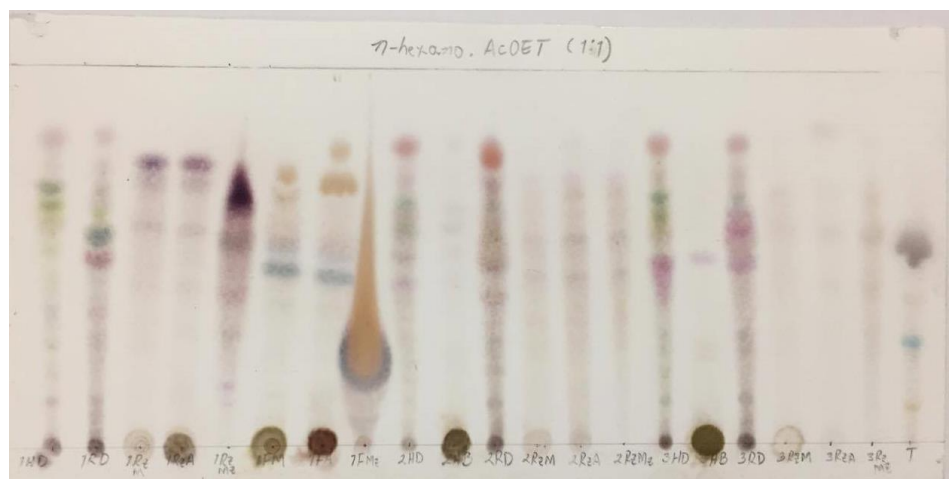

Sterols TLC [hexanes-ethyl acetate (1:1) developed with Liebermann-Burchard's reagent]

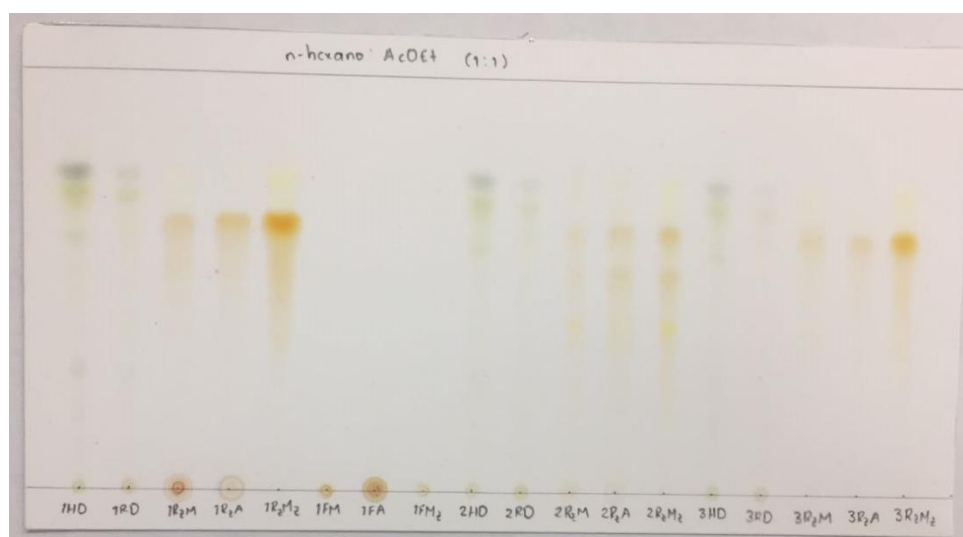

QMTs TLC [(hexanes-ethyl acetate (1:1); developed with visible light]

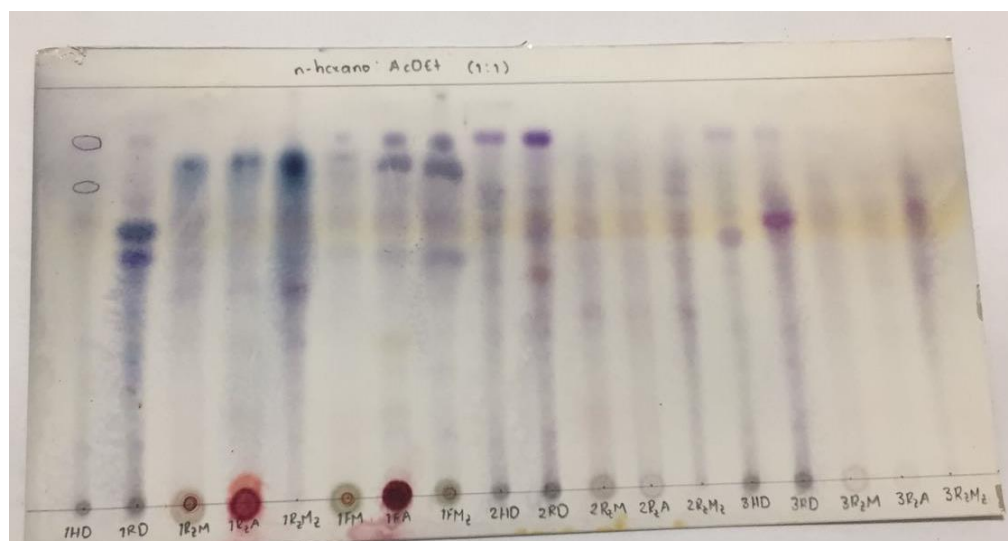

QMTs TLC [(hexanes-ethyl acetate (1:1); developed with Oleum's reagent and heat 100°C]

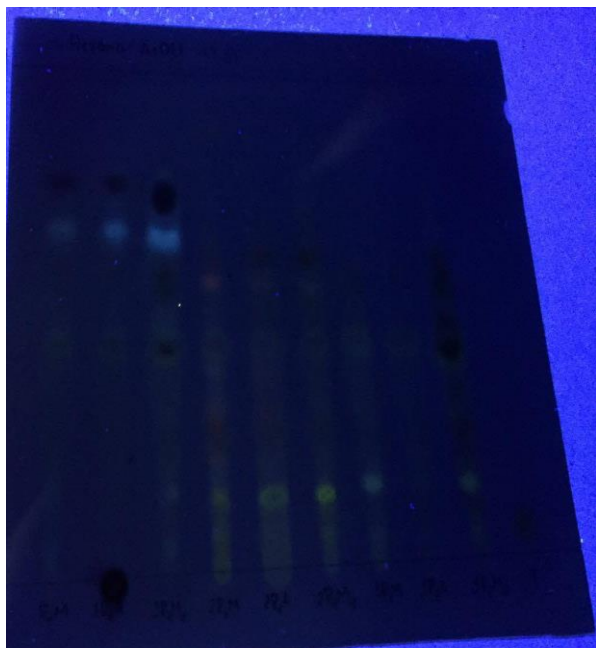

Flavonoids TLC [(hexanes-ethyl acetate (1:1); developed with 1% aluminum trichloride's reagent, and UV-365 nm]

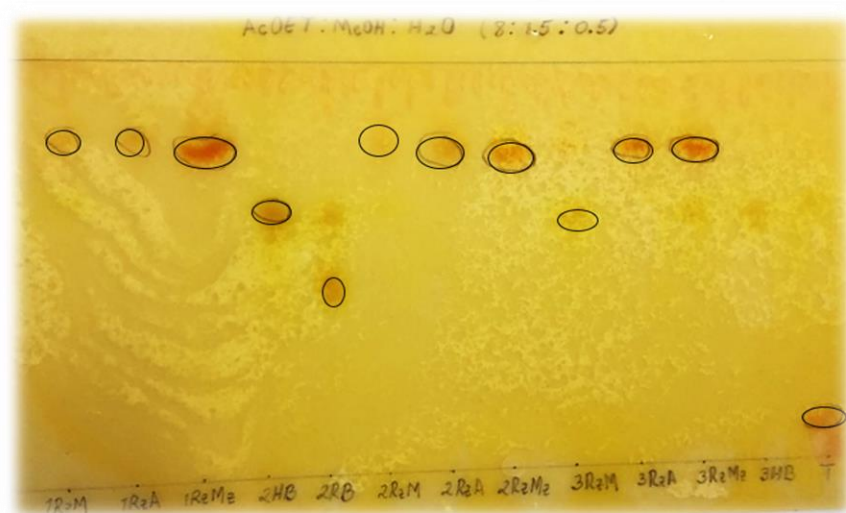

Alkaloids TLC [(ethyl acetate-MeOH-H<sub>2</sub>O (8:1.5:0.5); developed with Dragendorff's reagent]

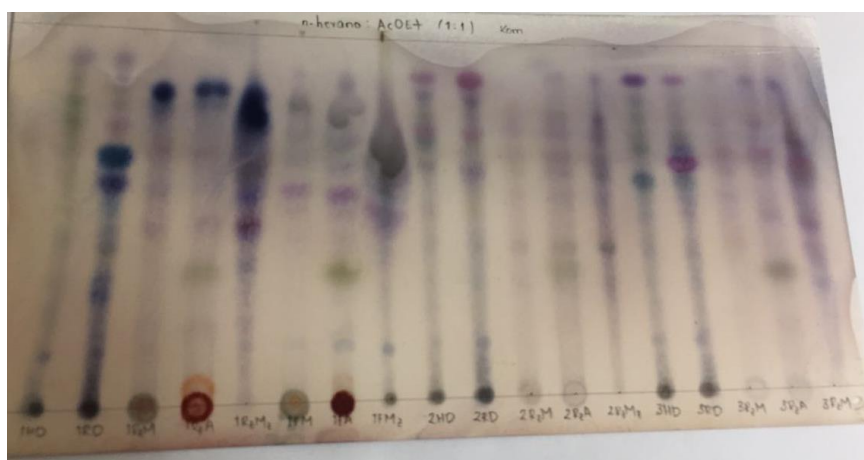

Triterpenes TLC [(hexanes-ethyl acetate (1:1); developed with Vanillin-sulfuric acid's reagent and heat 100°C]
